# Supplementary material for: Death-Associated Protein 6 (Daxx) Alleviates Liver Fibrosis by Modulating Smad2 Acetylation
Source: MDPI journal article supplement (doi:10.3390/cells10071742), 2021-07-09
Supplement: s1 [file s1]

**Table S1.** List of primary and secondary antibodies used in western blotting analysis.

| Name           | Supplier       | Cat no.   |
|----------------|----------------|-----------|
| Daxx           | Cell Signaling | #4533     |
| $\alpha$ -SMA  | Sigma-Aldrich  | A2547     |
| E-cadherin     | Cell Signaling | #3195     |
| Vimentin       | Cell Signaling | #5741     |
| p-Smad2        | Cell Signaling | # 18338   |
| Smad2          | Cell Signaling | #5339     |
| PARP           | Cell Signaling | #9532     |
| GAPDH          | Cell Signaling | #2118     |
| Ac-lysine      | Sigma-Aldrich  | 06-933    |
| p-p38          | Cell Signaling | #9211     |
| P38            | Cell Signaling | #8690     |
| p-JNK          | Cell Signaling | #4668     |
| JNK            | Santa Cruz     | sc-137018 |
| p-ERK          | Santa Cruz     | sc-7383   |
| ERK            | Santa Cruz     | sc-93     |
| p-AKT          | Cell Signaling | #4060     |
| AKT            | Cell Signaling | #9272     |
| PCNA           | abcam          | ab29      |
| $\beta$ -actin | Sigma-Aldrich  | A1978     |

**A**

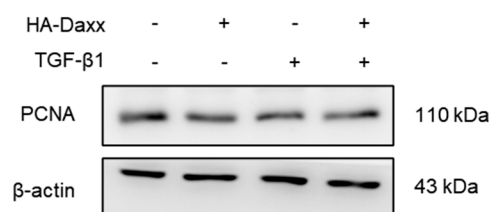

**B**

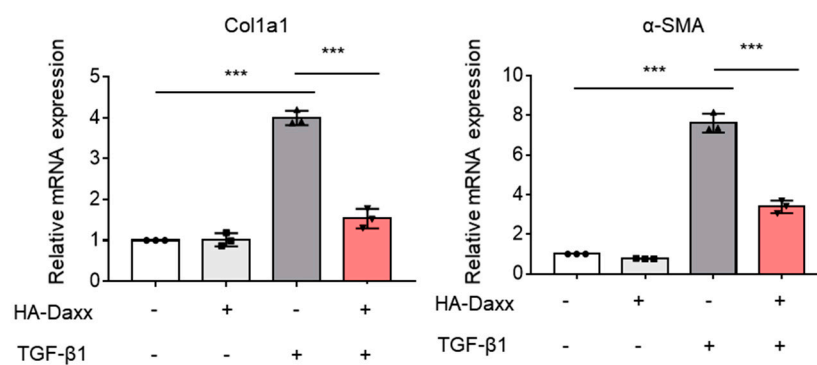

**Figure S1.** FL83B cells were transfected with HA-Daxx and then treated with or without TGF- $\beta$  for 24 h. **(A)** Western blotting analysis of PCNA expression. Relative expression was normalized to  $\beta$ -actin expression as a reference. **(B)** mRNA levels of Col1a1 and  $\alpha$ -SMA were analyzed by qPCR. All data are representative of at least three independent experiments. \*\*\*  $p < 0.001$

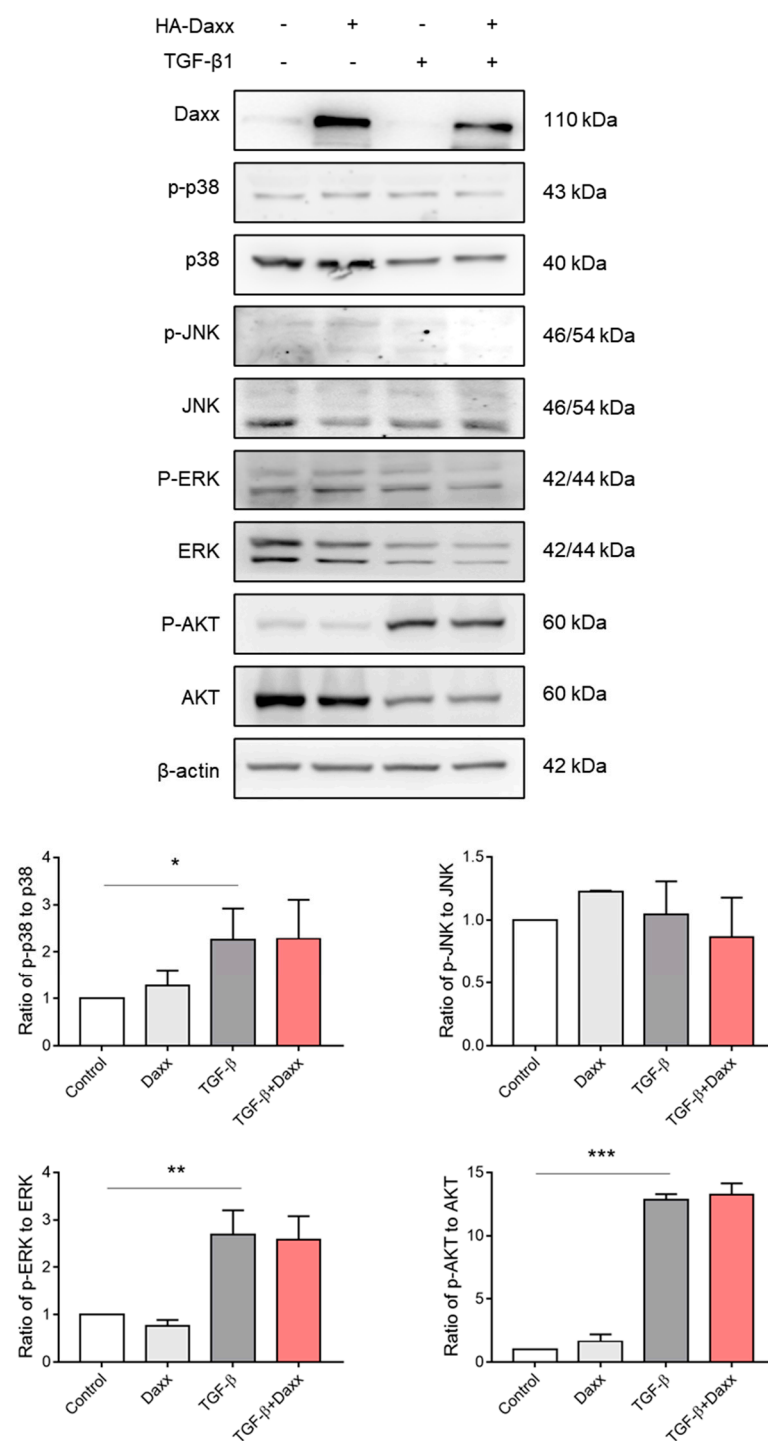

**Figure S2.** The expression of Daxx, p-p38, p38, p-JNK, JNK, p-ERK, ERK, p-AKT, AKT and  $\beta$ -actin were detected by Western blotting. The relative expression of phosphorylation was normalized to total protein level. These graphs show quantitative densitometry from the Western blot. All data are representative of at least three independent experiments. \*  $p < 0.05$ , \*\*  $p < 0.01$ , \*\*\*  $p < 0.001$ .

A

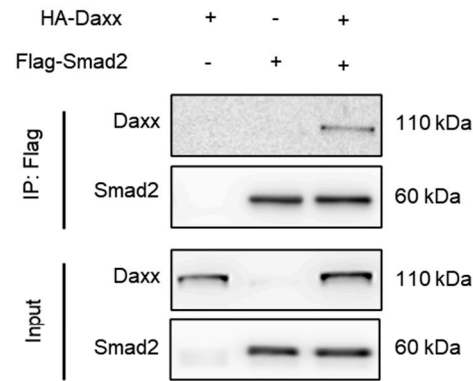

B

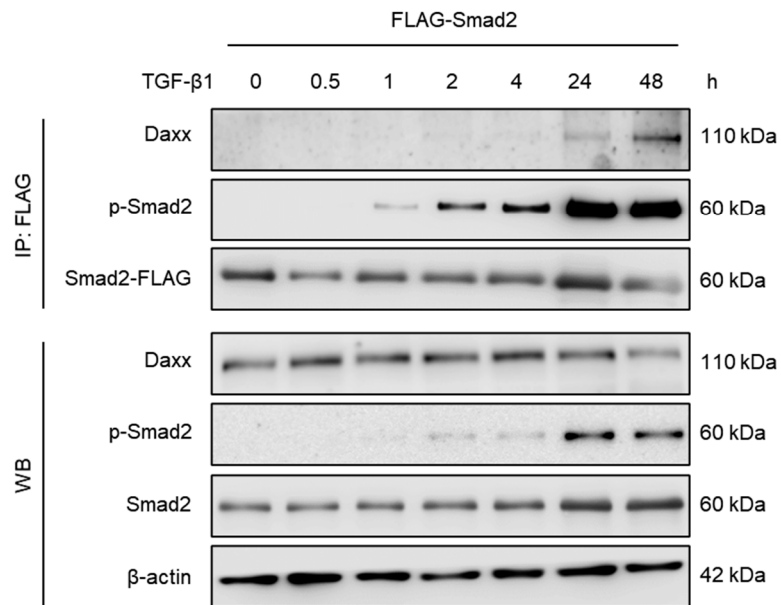

**Figure S3.** (A) HEK 293T cells were transfected with HA-Daxx and Flag-Smad2. Cell lysates were immunoprecipitated with anti-Flag beads. Then, precipitated proteins were separated by SDS-PAGE and detected with anti-Daxx and anti-Smad2 antibodies. (B) The FL83B cells were transfected with Flag-Smad2. Cell lysates were immunoprecipitated with anti-Flag beads. Then, precipitated proteins were separated by SDS-PAGE and detected with Daxx, p-Smad2 and Smad2 antibodies. All data are representative of at least three independent experiments.
